# Supplementary material for: Responses of the gut microbiota and metabolite profiles to sulfated polysaccharides from sea cucumber in humanized microbiota mice
Source: Royal Society of Chemistry journal article supplement (doi:10.1039/d1fo04443e), 2022-01-01

## Responses of gut microbiota and metabolite profiles to sulfated polysaccharide from sea cucumber in humanized microbiota mice

Zhengqi Liu<sup>a,b,c</sup>, Chunhong Yan<sup>a,b</sup>, Xinping Lin<sup>a,b</sup>, Chunqing Ai<sup>a,b</sup>, Xiuping Dong<sup>a,b</sup>, Li Shao<sup>a,b</sup>, Songtao Wang<sup>d</sup>, Shuang Song<sup>a,b,\*</sup> and Beiwei Zhu<sup>a,b,c</sup>

<sup>a</sup> National Engineering Research Center of Seafood, School of Food Science and Technology, Dalian Polytechnic University, Dalian, 116034, P. R. China

<sup>b</sup> National & Local Joint Engineering Laboratory for Marine Bioactive Polysaccharide Development and Application, Dalian Polytechnic University, Dalian, 116034, P. R. China

<sup>c</sup> Beijing Advanced Innovation Center for Food Nutrition and Human Health, College of Food Science and Nutritional Engineering, China Agricultural University, Beijing, 100083, P. R. China

<sup>d</sup> Luzhou Pinchuang Technology Company Limited, Luzhou, Sichuan 646000, P. R. China

**Table S1** Data preprocessing statistics and quality control. A0 and C0 stand for fecal samples inoculation solution.

**Table S2** Alpha **diversity** analysis index (The amount of data selected during homogenization: cutoff = 71207). A0 and C0 stand for fecal samples inoculation solution.

**Fig. S1** Amount of microbiota in mice feces at day 5. Data are expressed as the mean  $\pm$  SD (n = 3).

**Fig. S2** Amount of microbiota in mice feces at day 20. Data are expressed as the mean  $\pm$  SD (n = 3).

**Fig. S3** The high-performance gel-permeation chromatography chromatograms of SCSPsj and d-SCSPsj.

**Fig. S4** The standard curve of SCFAs in GC was used for calculation. Acetic acid (Ace), propionic acid (Pro), butyric acid (But), isobutyric acid (Isobut), valeric Acid (Val) and

isovaleric acid (Isoval), 2-ethylbutyric acid was used as internal standard.

**Fig. S5** PCA of identified metabolites in serum samples at positive ion mode (A). Comparison of metabolites in serum samples at positive ion mode using OPLS-DA (B).

**Fig. S6** PCA of identified metabolites in serum samples at negative ion mode (A). Comparison of metabolites in serum samples at negative ion mode using OPLS-DA (B).

**Fig. S7** PCA of identified metabolites in cecal contents samples at positive ion mode (A). Comparison of metabolites in cecal contents samples at positive ion mode using OPLS-DA (B).

**Fig. S8** PCA of identified metabolites in cecal contents samples at negative ion mode (A). Comparison of metabolites in cecal contents samples at negative ion mode using OPLS-DA (B).

**Table S1** Data preprocessing statistics and quality control.

| <b>Sample_name</b> | <b>Raw_reads(#)</b> | <b>Clean_Reads(#)</b> | <b>Base(nt)</b> | <b>AvgLen(nt)</b> | <b>Q20</b> | <b>GC%</b> | <b>Effective%</b> |
|--------------------|---------------------|-----------------------|-----------------|-------------------|------------|------------|-------------------|
| Control1           | 83616               | 80030                 | 20262050        | 253               | 89.19      | 54.88      | 95.71             |
| Control2           | 84108               | 80172                 | 20322964        | 253               | 90.3       | 52.49      | 95.32             |
| Control3           | 88398               | 80171                 | 20356051        | 253               | 89.67      | 50.36      | 90.69             |
| Control4           | 82401               | 80141                 | 20350125        | 253               | 89.92      | 52.35      | 97.26             |
| Control5           | 83322               | 80062                 | 20323245        | 253               | 90.77      | 50.46      | 96.09             |
| Control6           | 82720               | 80220                 | 20352970        | 253               | 89.6       | 49.92      | 96.98             |
| Sample1            | 84956               | 80069                 | 20322634        | 253               | 89.94      | 52.31      | 94.25             |
| Sample2            | 86497               | 80097                 | 20312539        | 253               | 89.1       | 52.69      | 92.6              |
| Sample3            | 87239               | 80095                 | 20310946        | 253               | 89.59      | 52.03      | 91.81             |
| Sample4            | 82590               | 80194                 | 20358421        | 253               | 89.64      | 52.36      | 97.1              |
| Sample5            | 84223               | 80072                 | 20323305        | 253               | 88.93      | 52.07      | 95.07             |
| Sample6            | 83292               | 80202                 | 20368176        | 253               | 89.38      | 52.58      | 96.29             |

**Table S2** Alpha **diversity** analysis index (The amount of data selected during homogenization: cutoff = 73373).

| <b>Sample Name</b> | <b>observed_species</b> | <b>shannon</b> | <b>simpson</b> | <b>chao1</b> | <b>ACE</b> | <b>goods_coverage</b> | <b>PD_whole_tree</b> |
|--------------------|-------------------------|----------------|----------------|--------------|------------|-----------------------|----------------------|
| Control1           | 398                     | 4.99           | 0.933          | 428.622      | 428.826    | 0.999                 | 25.452               |
| Control2           | 454                     | 5.174          | 0.923          | 505.395      | 490.365    | 0.999                 | 31.428               |
| Control3           | 290                     | 4.8            | 0.926          | 328.278      | 326.391    | 0.999                 | 20.869               |
| Control4           | 354                     | 3.505          | 0.744          | 387.553      | 385.918    | 0.999                 | 22.626               |
| Control5           | 261                     | 4.368          | 0.899          | 282.026      | 285.607    | 0.999                 | 19.896               |
| Control6           | 290                     | 4.474          | 0.903          | 314.5        | 322.523    | 0.999                 | 21.944               |
| Sample1            | 422                     | 4.268          | 0.867          | 459.196      | 456.04     | 0.999                 | 28.926               |
| Sample2            | 431                     | 5.029          | 0.898          | 452.022      | 453.549    | 0.999                 | 26.98                |
| Sample3            | 459                     | 5.329          | 0.933          | 488.216      | 485.167    | 0.999                 | 28.544               |
| Sample4            | 513                     | 5.059          | 0.87           | 556.522      | 568.63     | 0.999                 | 33.311               |
| Sample5            | 372                     | 3.717          | 0.755          | 392          | 394.446    | 0.999                 | 23.554               |
| Sample6            | 433                     | 4.809          | 0.887          | 464.571      | 464.01     | 0.999                 | 27.535               |

**Fig. S1** Amount of microbiota in mice feces at day 5. Data are expressed as the mean  $\pm$  SD (n = 3).

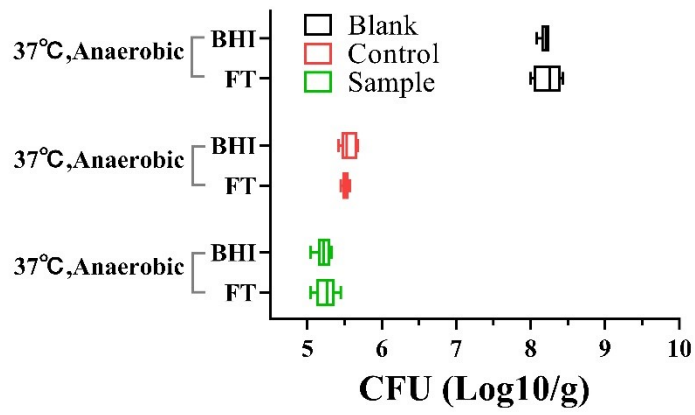

**Fig. S2** Amount of microbiota in mice feces at day 20. Data are expressed as the mean  $\pm$  SD (n = 3).

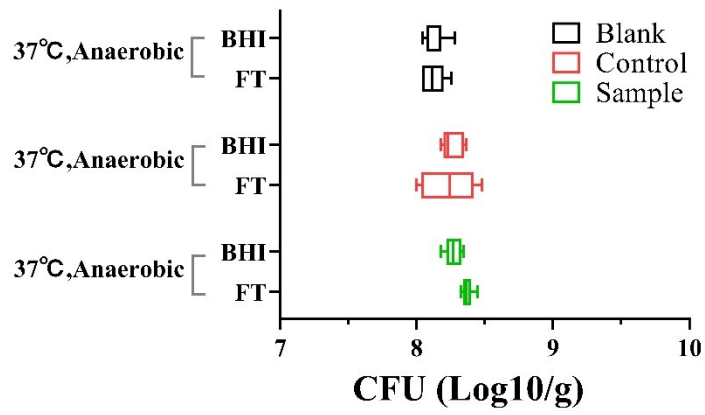

**Fig. S3** The high-performance gel-permeation chromatography chromatograms of SCSPsj and d-SCSPsj.

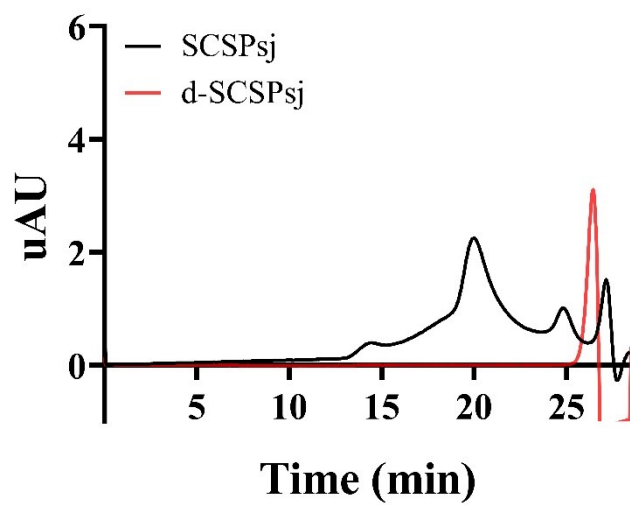

**Fig. S4** The standard curve of SCFAs in GC was used for calculation. Acetic acid (Ace), propionic acid (Pro), butyric acid (But), isobutyric acid (Isobut), valeric Acid (Val) and isovaleric acid (Isoval). 2-ethylbutyric acid was used as internal standard.

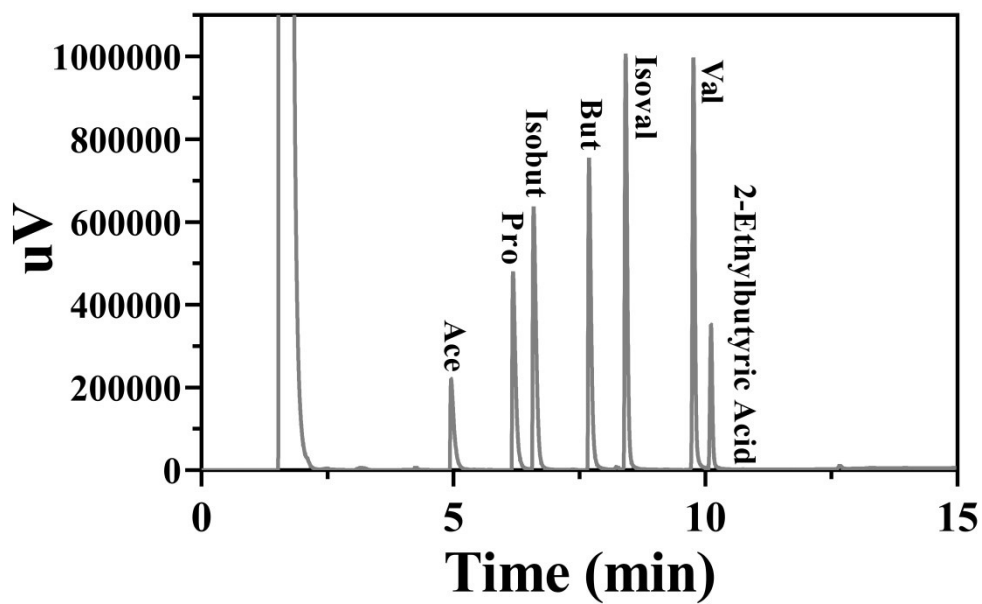



**Fig. S5** PCA of identified metabolites in serum samples at positive ion mode (A). Comparison of metabolites in serum samples at positive ion mode using OPLS-DA (B).

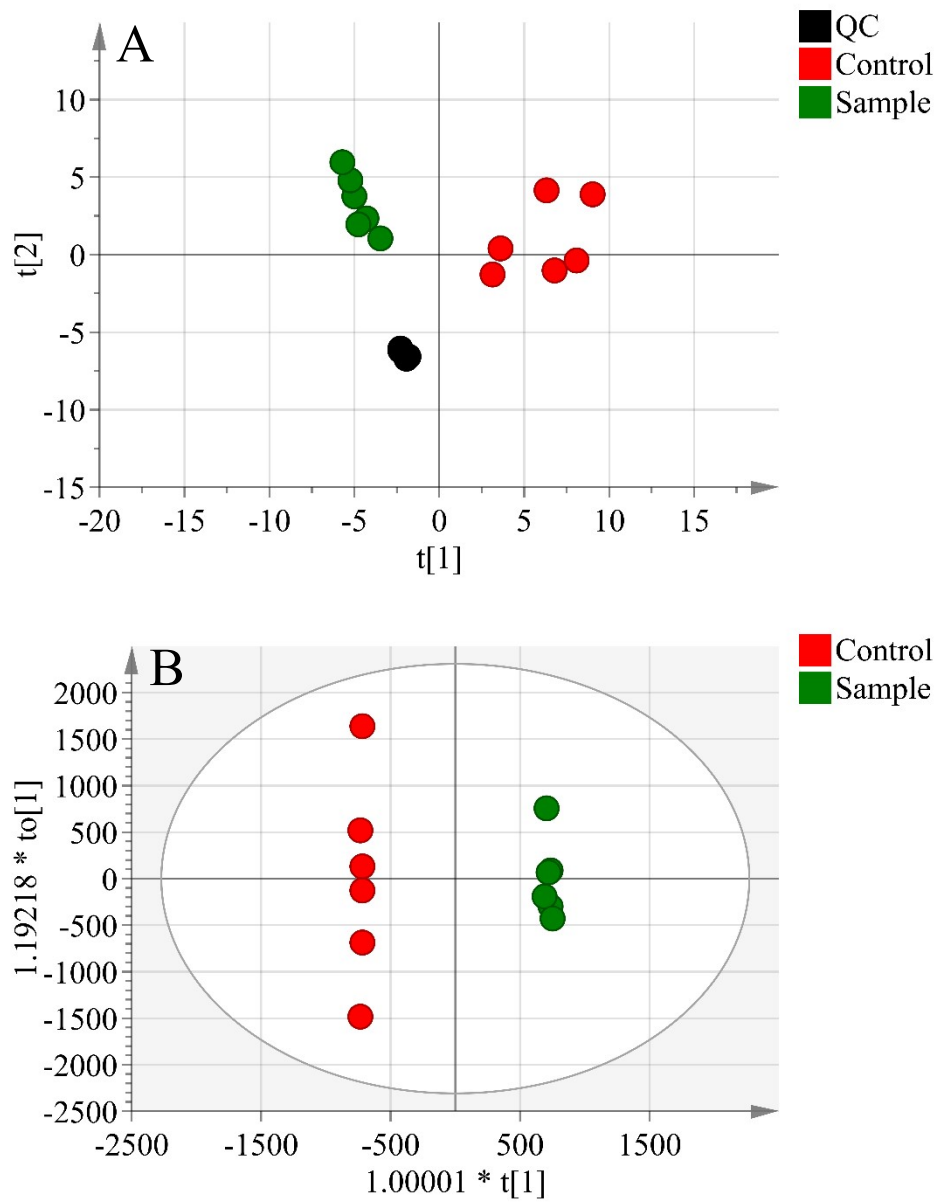

**Fig. S6** PCA of identified metabolites in serum samples at negative ion mode (A). Comparison of metabolites in serum samples at negative ion mode using OPLS-DA (B).

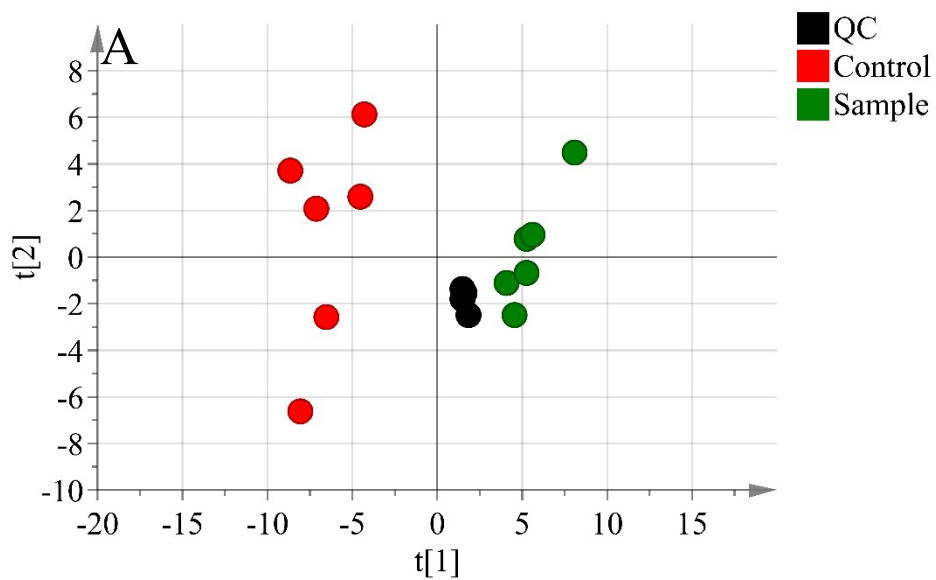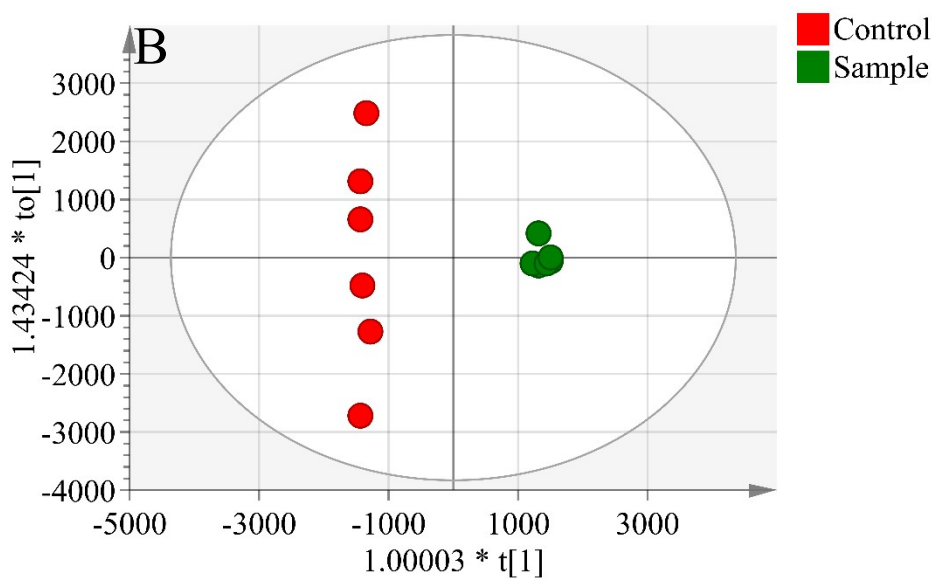

**Fig. S7** PCA of identified metabolites in cecal contents samples at positive ion mode (A). Comparison of metabolites in cecal contents samples at positive ion mode using OPLS-DA (B).

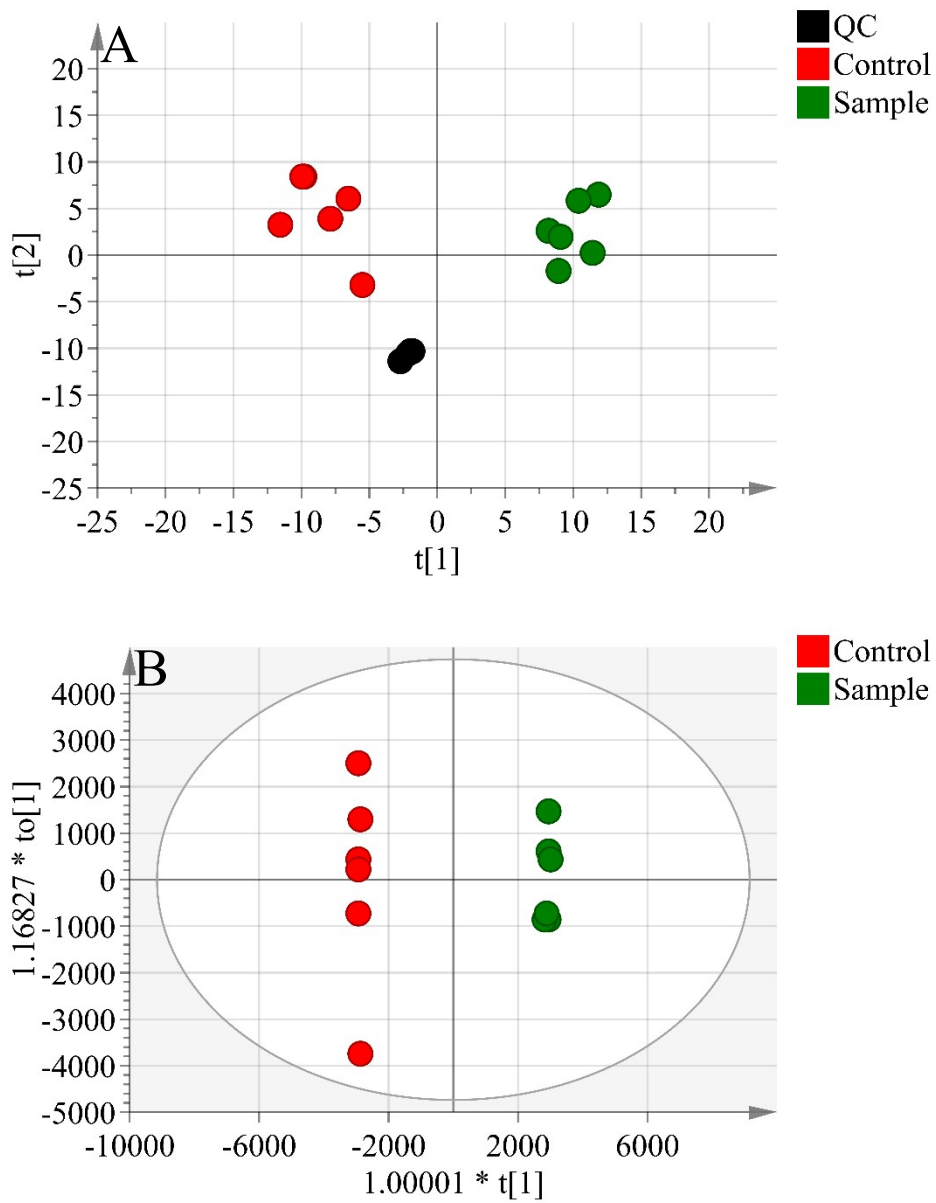

**Fig. S8** PCA of identified metabolites in cecal contents samples at negative ion mode (A). Comparison of metabolites in cecal contents samples at negative ion mode using OPLS-DA (B).

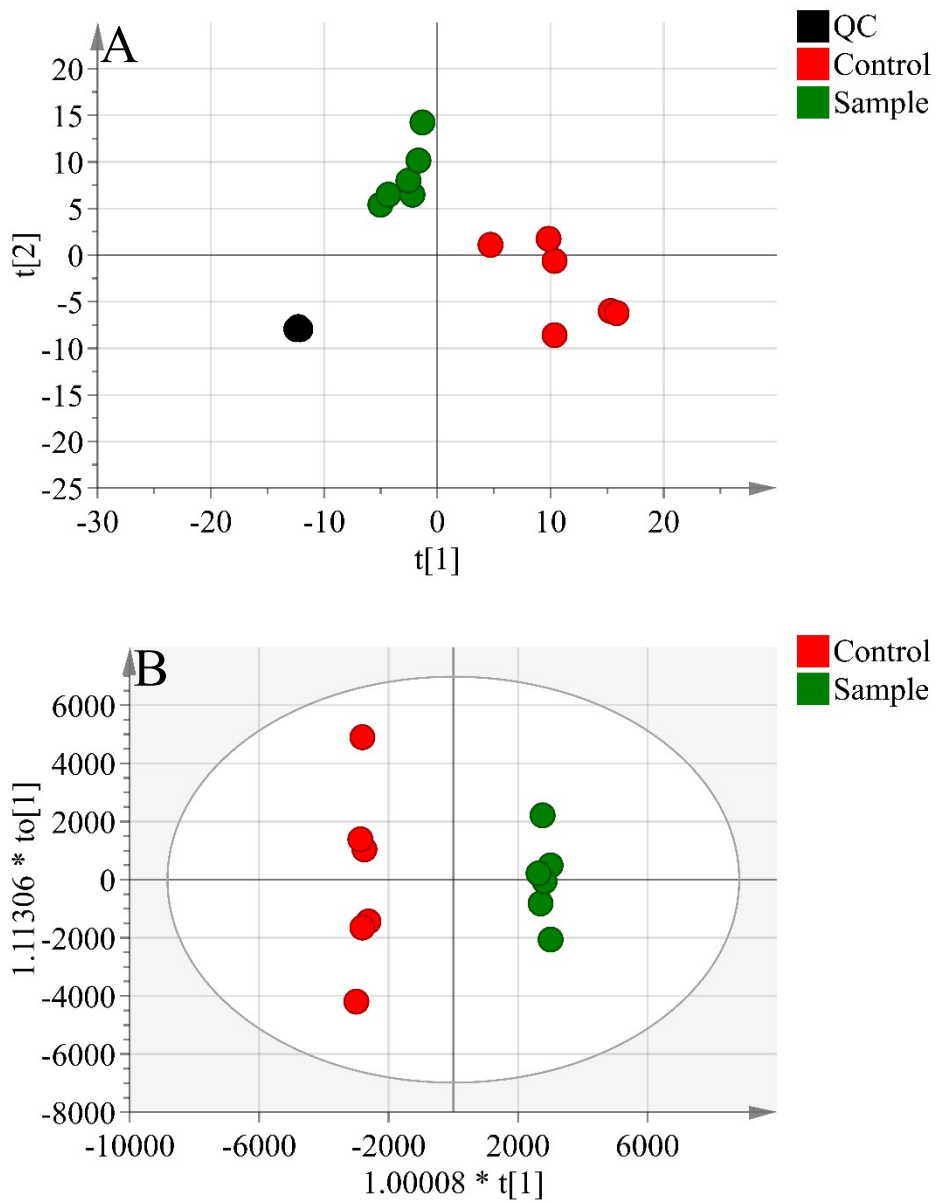

Supplement: d1fo04443e1.pdf [file d1fo04443e1.pdf]
